# Supplementary material for: The mutational pattern of homologous recombination (HR)-associated genes and its relevance to the immunotherapeutic response in gastric cancer
Source: PubMed Central journal article supplement (PMC7721103; doi:10.20892/j.issn.2095-3941.2020.0089), 2020-12-15
Supplement: cbm-17-1002-s001.pdf [file cbm-17-1002-s001.pdf]

# Supplementary materials

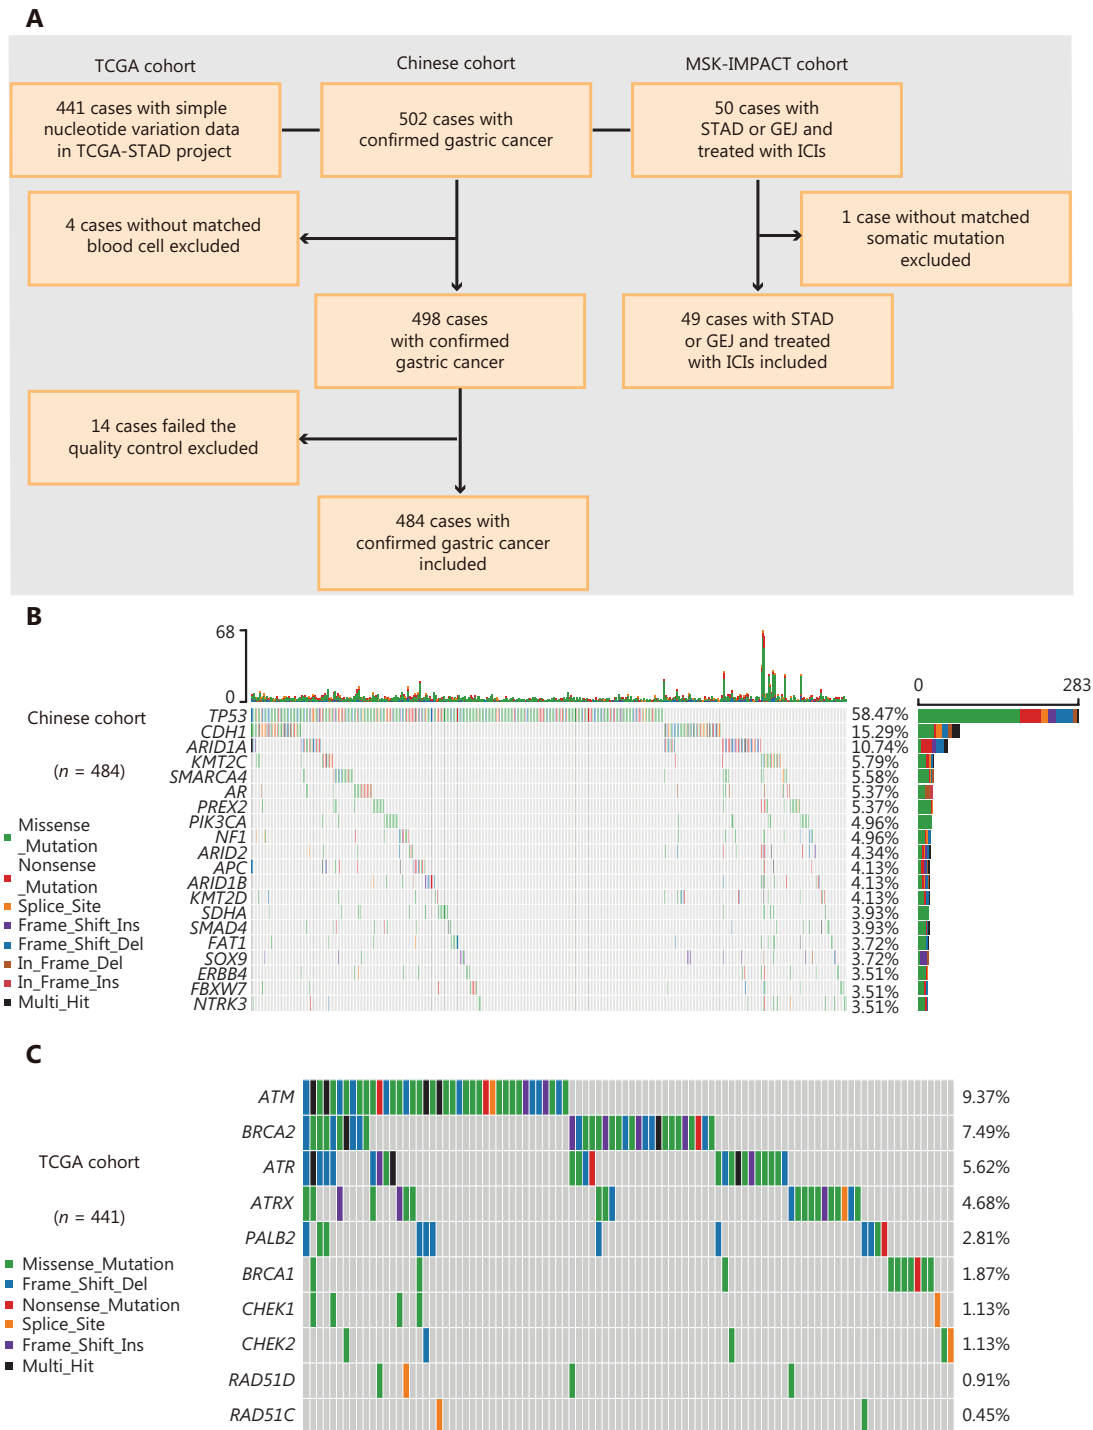

**Figure S1** Landscape of GC patient mutations. (A–C) Flow chart for participant selection (A), mutational landscape of the top 20 mutated genes in the Chinese cohort (B), and HR genes in the cohort from TCGA (C). The columns and rows represent patients and genes, respectively, and are sorted by the number of patients in which a gene is mutated, in descending order. The right panel indicates the frequency of gene mutations. Mutation types are differentiated by colors. Thirty samples with no mutations detected from this panel are not shown in this figure.

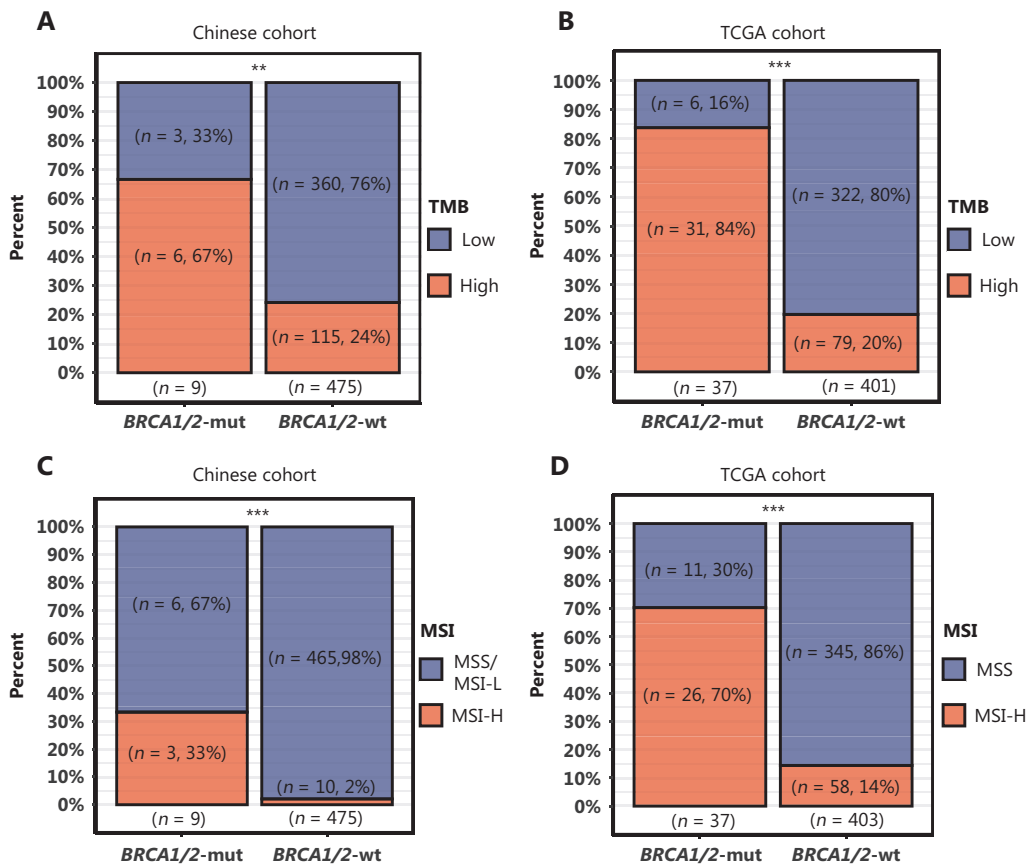

**Figure S2** Associations among mutations of *BRCA1/2*-mut, the tumor mutation burden (TMB) and the microsatellite instability (MSI) status. (A, B) Bar plots display the percentage of TMB-high patients in the *BRCA1/2*-mut group compared with the *BRCA1/2*-wt group in the Chinese (A) and TCGA (B) cohorts. (C, D) Bar plots display the percentage of MSI-H patients in the *BRCA1/2*-mut group compared with the *BRCA1/2*-wt group in the Chinese (C) and TCGA (D) cohorts. Comparisons between groups were performed with Fisher's exact test (\*\* $P < 0.01$ , \*\*\* $P < 0.001$ ).



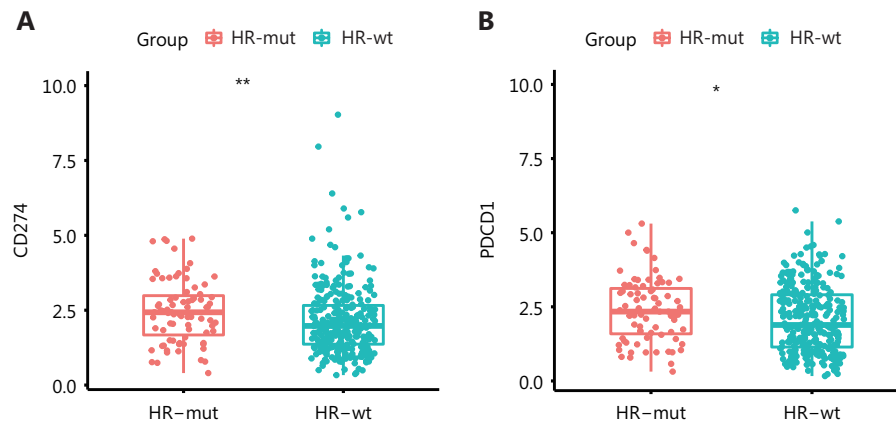

**Figure S4** HR-mut status is associated with elevated expression level of immune checkpoint molecules. (A, B) Expression of *CD274* (A) and *PDCD1* (B) in HR-mut GC is greater than that in the HR-wt group. *P*-values were calculated with the Wilcoxon test; the box shows the upper and lower quartiles (\**P* < 0.05; \*\**P* < 0.01).

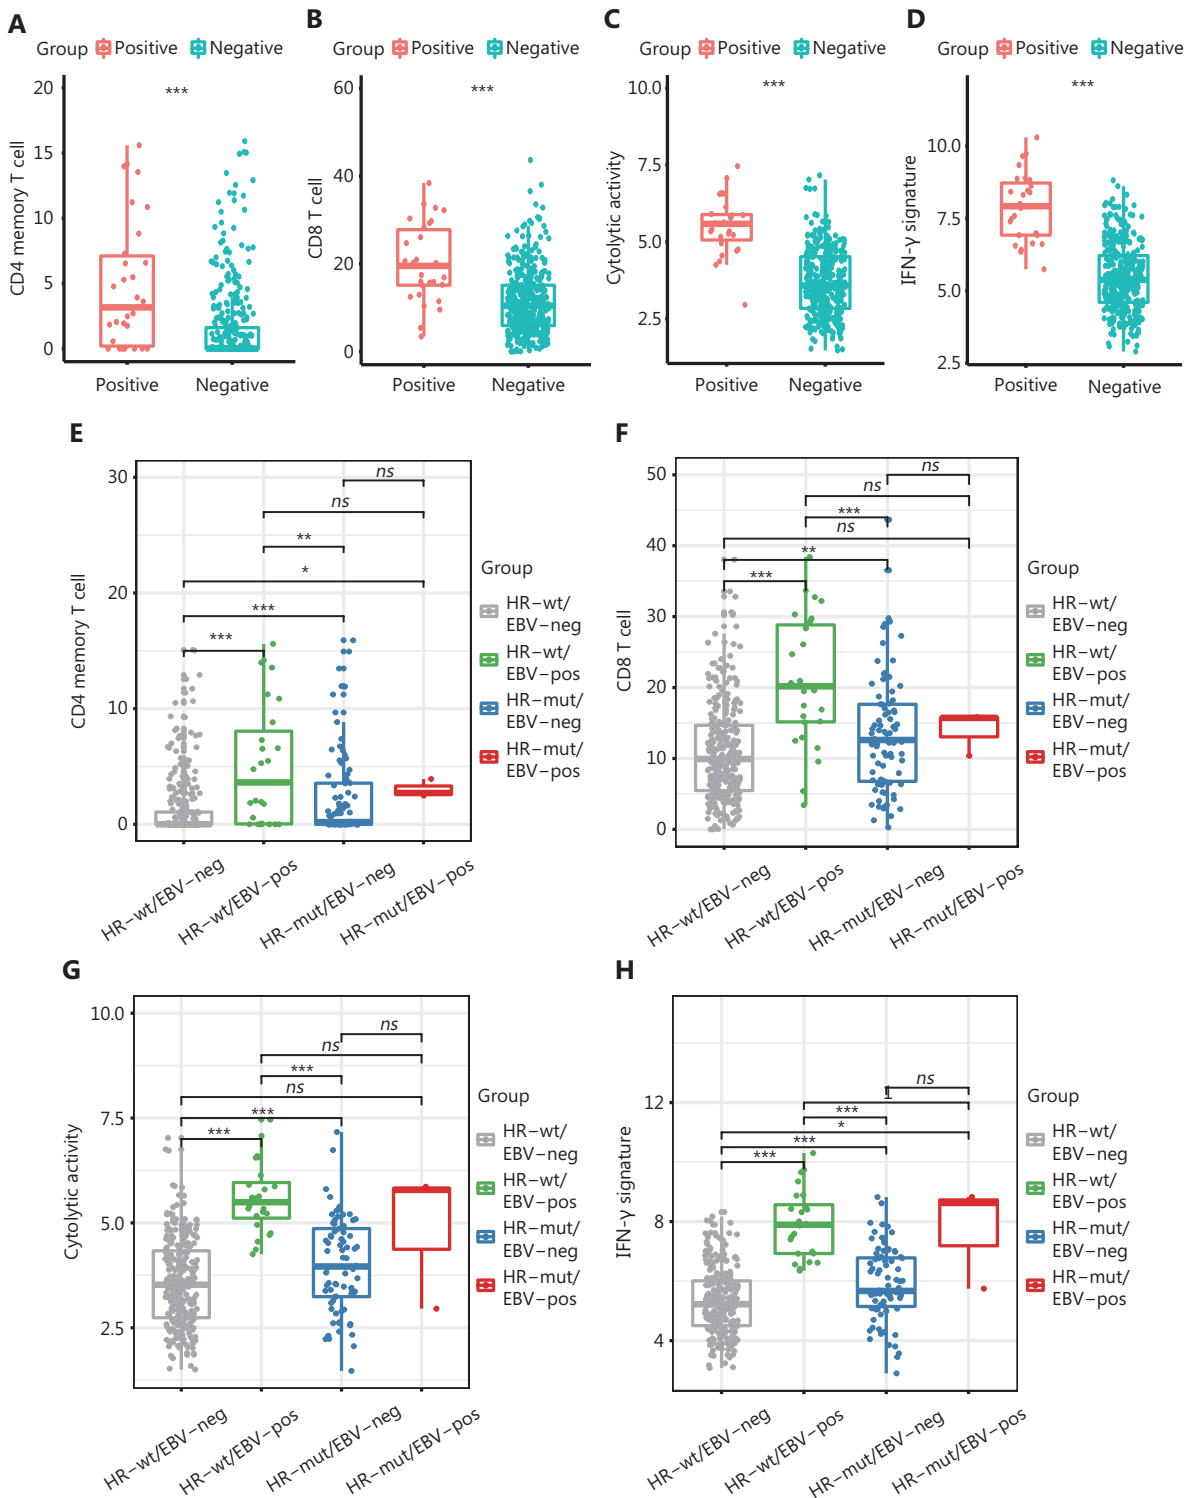

**Figure S5** Associations among EBV infection status, HR-mut status and immune activity in GC. (A) The fraction of CD4 memory T cells, as inferred with CIBERSORT, is higher in EBV positive GC than in EBV negative GC. (B) The fraction of CD8-positive T cells is higher in EBV positive GC than in EBV negative GC. (C, D) Cytolytic activity (C) and IFN- $\gamma$  signature (D) is significantly higher in EBV positive GC than in EBV negative GC. (E-H) Box plots show the fraction of CD4 memory T cells (E), fraction of CD8-positive T cells (F), cytolytic activity (G) and IFN- $\gamma$  signature (H) in the HR-wt/EBV-neg, HR-wt/EBV-pos, HR-mut/EBV-neg, and HR-mut/EBV-pos groups. *P*-values were calculated with the Wilcoxon test; the box shows the upper and lower quartiles (\**P* < 0.05; \*\**P* < 0.01; \*\*\**P* < 0.001; ns, *P* > 0.05).

**Table S1** Demographic distribution of the Chinese cohort ( $n = 484$ ), TCGA cohort ( $n = 441$ ), and MSK-IMPACT cohort ( $n = 49$ )

| Characteristics | Chinese cohort |               | TCGA cohort  |               | MSK-IMPACT cohort |               |
|-----------------|----------------|---------------|--------------|---------------|-------------------|---------------|
|                 | <i>n</i> (%)   | Mean (SD)     | <i>n</i> (%) | Mean (SD)     | <i>n</i> (%)      | Mean (SD)     |
| Age             |                | 57.39 (13.04) |              | 65.69 (10.74) |                   | 61.12 (13.33) |
| Sex             |                |               |              |               |                   |               |
| Male            | 312 (64.5)     |               | 283 (64.2)   |               | 37 (75.5)         |               |
| Female          | 172 (35.3)     |               | 158 (35.8)   |               | 12 (24.5)         |               |
| Stage           |                |               |              |               |                   |               |
| I               | 11 (2.3)       |               | 59 (13.4)    |               |                   |               |
| II              | 7 (1.4)        |               | 130 (29.5)   |               |                   |               |
| III             | 177 (36.6)     |               | 186 (42.2)   |               |                   |               |
| IV              | 278 (57.4)     |               | 43 (9.8)     |               |                   |               |
| Missing data    | 11 (2.3)       |               | 23 (5.2)     |               |                   |               |
| EBV             |                |               |              |               |                   |               |
| Positive        |                |               | 30 (6.8)     |               |                   |               |
| Negative        |                |               | 353 (80.0)   |               |                   |               |
| Missing data    |                |               | 58 (13.2)    |               |                   |               |

**Table S2** Details of all deleterious germline mutations in HR genes in the Chinese cohort

| Sample_id    | Gene_refGene | Chrom | Depth | Mutation_g                       | Mutation_c       | Mutation_p    |
|--------------|--------------|-------|-------|----------------------------------|------------------|---------------|
| P176898_STAD | ATM          | chr11 | 612   | chr11:g.108128241_108128242delCT | c.2284_2285delCT | p.L762Vfs*2   |
| P178947_STAD | ATM          | chr11 | 380   | chr11:g.108160488C>T             | c.4396C>T        | p.R1466*      |
| P179015_STAD | ATM          | chr11 | 503   | chr11:g.108121594_108121595delAA | c.1402_1403delAA | p.K468Efs*18  |
| P186259_STAD | ATM          | chr11 | 167   | chr11:g.108115727C>T             | c.875C>T         | p.P292L       |
| P186371_STAD | ATM          | chr11 | 347   | chr11:g.108178646C>A             | c.5697C>A        | p.C1899*      |
| P193132_STAD | ATM          | chr11 | 492   | chr11:g.108196887delG            | c.6910delG       | p.E2304Sfs*6  |
| P191191_STAD | BRCA1        | chr17 | 385   | chr17:g.41201209delG             | c.5335delC       | p.Q1779Nfs*14 |
| P186915_STAD | BRCA1        | chr17 | 187   | chr17:g.41276044A>G              | c.70T>C          | p.C24R        |
| P186190_STAD | BRCA2        | chr13 | 288   | chr13:g.32911601C>T              | c.3109C>T        | p.Q1037*      |
| P177494_STAD | BRCA2        | chr13 | 345   | chr13:g.32911542T>G              | c.3050T>G        | p.I1017S      |
| P189032_STAD | CHEK2        | chr22 | 188   | chr22:g.29083962G>A              | c.1555C>T        | p.R519*       |
| P189606_STAD | CHEK2        | chr22 | 436   | chr22:g.29121258G>T              | c.417C>A         | p.Y139*       |
| P181878_STAD | PALB2        | chr16 | 450   | chr16:g.23637612C>T              | c.2693G>A        | p.W898*       |
| P184904_STAD | RAD51C       | chr17 | 347   | chr17:g.56787223C>T              | c.709C>T         | p.R237*       |
| P193918_STAD | RAD51C       | chr17 | 440   | chr17:g.56772540dupA             | c.394dupA        | p.T132Nfs*23  |

**Table S3** Immune signature gene sets

| pDCs   | Co-inhibition,<br>APC | Type II IFN<br>response | Cytolytic<br>activity | MHC<br>class I | CD8+<br>T cells | Co-inhibition,<br>T cell | Co-stimulation,<br>APC |
|--------|-----------------------|-------------------------|-----------------------|----------------|-----------------|--------------------------|------------------------|
| LILRA4 | PDCD1LG2              | GPR146                  | GZMA                  | HLA-A          | CD8A            | LAG3                     | ICOSLG                 |
| CLEC4C | CD274                 | SELP                    | PRF1                  | B2M            |                 | CTLA4                    | CD70                   |
| PLD4   | C10orf54              | AHR                     |                       | TAP1           |                 | CD274                    | TNFSF14                |
| PHEX   | LGALS9                |                         |                       |                |                 | CD160                    | CD40                   |
| IL3RA  | PVRL3                 |                         |                       |                |                 | BTLA                     | TNFSF9                 |
| PTCRA  |                       |                         |                       |                |                 | C10orf54                 | TNFSF4                 |
| IRF8   |                       |                         |                       |                |                 | LAIR1                    | TNFSF15                |
| IRF7   |                       |                         |                       |                |                 | HAVCR2                   | TNFSF18                |
| GZMB   |                       |                         |                       |                |                 | CD244                    | TNFSF8                 |
| CXCR3  |                       |                         |                       |                |                 | TIGIT                    | SLAMF1                 |
|        |                       |                         |                       |                |                 |                          | CD58                   |

pDCs, plasmacytoid dendritic cells; APC, adenomatous polyposis coli; IFN, interferon; CD8+, CD8-positive.

**Table S4** IFN- $\gamma$  signature gene sets

| Genes   |
|---------|
| IDO1    |
| CXCL10  |
| CXCL9   |
| HLA-DRA |
| STAT1   |
| IFNG    |
